## **Subunit epsilon of *E. coli* F<sub>1</sub>F<sub>o</sub> ATP synthase attenuates enzyme activity by modulating central stalk flexibility**

Meghna Sobti<sup>1,2</sup>, James L. Walshe<sup>1</sup>, Yi C. Zeng<sup>1</sup>, Robert Ishmukhametov<sup>3</sup> and Alastair G. Stewart<sup>1,2\*</sup>

<sup>1</sup>Molecular, Structural and Computational Biology Division, The Victor Chang Cardiac Research Institute, Darlinghurst, Australia.

<sup>2</sup>St Vincent's Clinical School, Faculty of Medicine, UNSW Sydney, Kensington, Australia.

<sup>3</sup>Department of Physics, Clarendon Laboratory, University of Oxford, Oxford, United Kingdom

\*Corresponding author: [a.stewart@victorchang.edu.au](mailto:a.stewart@victorchang.edu.au)

**Keywords:** ATPase, inhibition, cryo-EM

**ABSTRACT:** F<sub>1</sub>F<sub>o</sub> ATP synthase functions as a biological rotary generator that makes a major contribution to cellular energy production. Proton flow through the F<sub>o</sub> motor generates rotation of the central stalk, inducing conformational changes in the F<sub>1</sub> motor that catalyzes ATP production via flexible coupling. Here we present a range of cryo-EM structures of *E. coli* ATP synthase in different rotational and inhibited states observed following a 45 second incubation with 10 mM MgATP. The structures generated describe multiple changes that occur following addition of MgATP, with the inhibitory C-terminal domain of subunit ε (εCTD) disassociating from the central stalk to adopt a condensed “down” conformation. The transition to the εCTD down state increases the torsional flexibility of the central stalk allowing its foot to rotate by ~50°, with further flexing in the peripheral stalk enabling the *c*-ring to rotate by two sub-steps in the F<sub>o</sub> motor.

Truncation mutants lacking the second helix of the  $\epsilon$ CTD suggest that central stalk rotational flexibility is important for  $F_1F_o$  ATP synthase function. Overall this study identifies the potential role played by torsional flexing within the rotor and how this could be influenced by the  $\epsilon$  subunit.

**Main Text:** A key component in the generation of cellular metabolic energy is the  $F_1F_o$  ATP synthase, a biological rotary motor that converts proton motive force (pmf) to adenosine triphosphate (ATP) in both oxidative phosphorylation and photophosphorylation<sup>1-3</sup>. The enzyme is comprised of two rotary motors, termed  $F_1$  and  $F_o$ , that are coupled together by two stalks: a central “rotor” stalk and a peripheral “stator” stalk. The  $F_o$  motor spans the membrane and converts the potential energy from the pmf into mechanical rotation of the central rotor that, in turn, drives conformational changes in the catalytic  $F_1$  motor subunits that generate ATP from ADP and inorganic phosphate ( $P_i$ )<sup>4,5</sup>. *E. coli* contains the simplest form of  $F_1F_o$  ATP synthase, with only eight different types of subunit, and has therefore been used extensively as a model system for ATP synthases<sup>6</sup>.

Because  $F_1F_o$  ATP synthase can operate in reverse, cells have evolved mechanisms to avoid wasteful hydrolysis of ATP that could occur under physiological conditions. Bacterial ATP synthases appear to utilize a range of different mechanisms for inhibition, with nucleotides, ions and conformational changes likely making contributions<sup>7,8</sup>, with functional studies showing these mechanisms to be mutually exclusive<sup>9</sup>. MgADP is known to inhibit ATPases<sup>10,11</sup>, and can cause the enzyme to fall into a low energy minimum in which MgADP is bound tightly to the catalytic sites. In *E. coli* and other related bacteria, the C-terminal domain of subunit  $\epsilon$  ( $\epsilon$ CTD) also appears to play a crucial role in inhibiting the enzyme by inserting into the  $F_1$  motor and blocking rotation

of the central stalk<sup>7,12-14</sup>. In *E. coli*, the  $\epsilon$ CTD is comprised of two short helices, residues 86-101 and 110-124 (referred to as  $\epsilon$ CTH1 and  $\epsilon$ CTH2 respectively) connected by a linker. Multiple structural studies examining *E. coli* F<sub>1</sub> or F<sub>1</sub>F<sub>o</sub> ATP synthase either in the absence of nucleotide<sup>15</sup> or in the presence of AMPPNP<sup>13</sup> or MgADP<sup>16</sup>, have shown the  $\epsilon$ CTD oriented in an extended “up” position, and the isolated subunit has also been crystallized in the condensed “down” position<sup>17</sup>. Our previous  $\sim 5$  Å resolution cryo-Electron Microscopy (cryo-EM) study of *E. coli* F<sub>1</sub>F<sub>o</sub> ATP synthase following incubation with 10 mM MgATP<sup>18</sup> showed that, under these conditions, the  $\epsilon$ CTD transitions to a condensed “down” conformation via a “half-up” intermediate in which the  $\epsilon$ CTH1 remains attached to the central stalk. However, because of the limited resolution of the earlier study, it was not possible to establish the molecular details of how this transition took place.

To understand the detailed structural changes that occur as a result of ATP binding, we have used cryo-EM to examine, at higher resolution, detergent solubilized *E. coli* ATP synthase<sup>19</sup> following a 45 second incubation with 10 mM MgATP. We show that nucleotide exchange associated with conformational changes of the  $\epsilon$ CTD and catalytic  $\alpha\beta$  subunits induces a small rotation of the central stalk in comparison to the structure of the enzyme seen in the presence of MgADP. However, after incubation with MgATP, the  $\beta 2$  site still contains ADP, suggesting that the enzyme is in an ADP inhibited state. Strikingly, the transition of the  $\epsilon$ CTD to a “down” condensed state in these structures is associated with rotational flexing of the central stalk, which when combined with bending in the peripheral stalk, results in a rotation within the F<sub>o</sub> motor of two *c* subunits. Truncation constructs of the  $\epsilon$ CTD show that the potential interaction between the  $\epsilon$ CTH1 and  $\gamma$  subunit decreases the rate of ATP hydrolysis and aerobic growth. Single molecule<sup>20,21</sup> and molecular dynamic studies<sup>22</sup> have indicated that the central rotor could be flexible, but the

work presented here shows how this torsional flexibility in the rotor is achieved and how subunit  $\epsilon$  is able to modulate it. Furthermore, because the  $\epsilon$ CTD has been shown to be important for pathogenic bacterial virulence and survival<sup>23-25</sup> this information may aid the development of bacterial antibiotics targeting these inhibitory mechanisms.

### **Results:**

#### *Nucleotide occupancy and conformation of the $F_1$ -ATPase following incubation with MgATP*

300 kV cryo-EM was employed to obtain sufficiently high resolution to define how MgATP induces changes within the  $F_1$  motor. Maps of *E. coli*  $F_1F_0$  ATP synthase in the presence of 10 mM MgATP were obtained using methods similar to those in previous studies<sup>15,16,18,26</sup> (Extended Data Fig. 1 and 2) and provided superior structural information than was observed previously using 200 kV for this complex in the presence of MgATP<sup>18</sup>. The overall resolution improved from 5-6 Å to ~3 Å, which enabled bound nucleotides to be identified and modeled (Fig. 1a). Previous work<sup>15</sup> had identified the three major conformational states of the enzyme in which the central stalk is rotated by ~120° relative to peripheral stalk (termed “State 1”, “State 2” and “State 3” and which refer to the enzyme operating in ATP hydrolysis direction) and the data presented here enabled the generation of cryo-EM maps of these states that had resolutions of 3.0, 2.7 and 3.0 Å, respectively (Extended Data Fig. 2). These maps showed that the nucleotide occupancy and conformation of the  $F_1$ -ATPase differs when the enzyme is incubated with MgATP rather than MgADP<sup>16</sup>. After incubation with 10 mM MgATP, all the non-catalytic  $\alpha$  subunits contained MgATP (Extended Data Fig. 3), whereas the contents of the  $\beta$  subunits varied:  $\beta_1$  ( $\beta_{DP}$ ) contained MgADP,  $\beta_2$  ( $\beta_E$ ) contained ADP and  $\beta_3$  ( $\beta_{TP}$ ) contained MgATP (Fig. 1a). Compared to the same

enzyme imaged in the presence of 10 mM MgADP<sup>16</sup>, the central stalk was rotated  $\sim 10^\circ$  in the synthase direction (Fig. 1b), the  $\epsilon$ CTH2 had dissociated from the central stalk, and the  $\beta 1$  ( $\beta_{DP}$ ) subunit had closed to contact the  $\gamma$  subunit (Fig. 1c). Even with the high-resolutions estimated for these maps, the  $F_0$  region and position of the  $\epsilon$  subunit remained ambiguous (Extended Data Figure 4), hence further data processing was performed to verify the location of the  $\epsilon$ CTD and  $c$ -ring, as described in the following section.

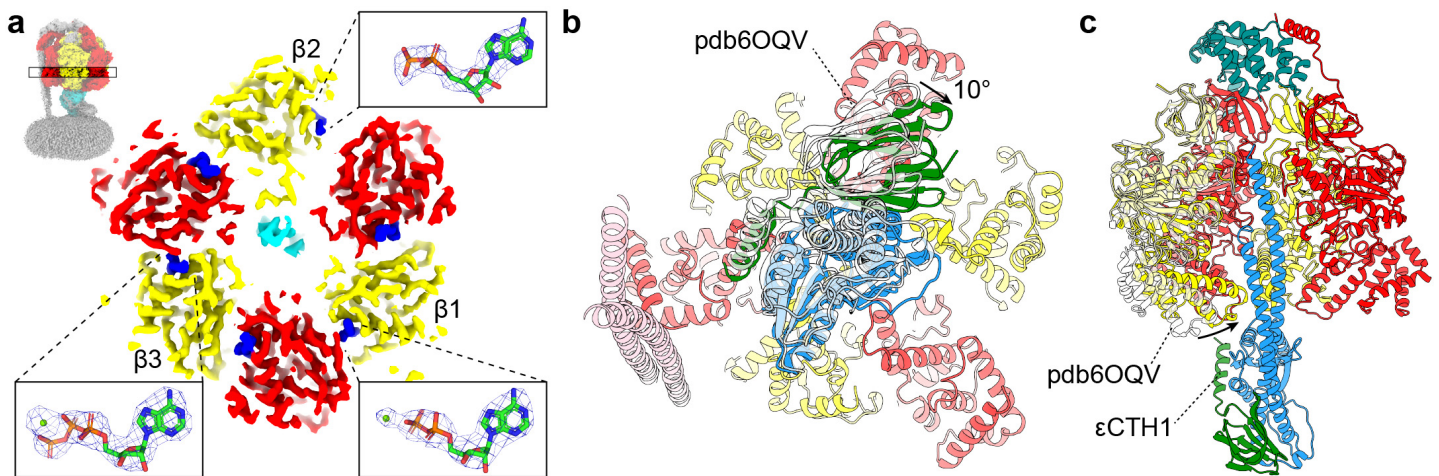

**Figure 1: Nucleotide occupancy and conformational changes in  $F_1$ -ATPase following incubation with MgATP.** (a) Horizontal section of the State 2 *E. coli*  $F_1F_0$  ATP synthase cryo-EM map viewed from above, together with details of the catalytic sites in the  $\beta$  subunits (with equivalent mitochondrial  $F_1$  nomenclature<sup>4</sup>:  $\beta 1 = \beta_{DP}$ ,  $\beta 2 = \beta_E$ ,  $\beta 3 = \beta_{TP}^{13}$ ). Subunits  $\alpha$  in red,  $\beta$  in yellow and  $\gamma$  in cyan, with nucleotide density in dark blue. Higher magnification details of the catalytic sites (inserts) show atomic models, together with cryo-EM maps for the nucleotides (blue mesh).  $\beta_{DP}$  ( $\beta 1$ ) contains MgADP,  $\beta_E$  ( $\beta 2$ ) contains ADP, and  $\beta_{TP}$  ( $\beta 3$ ) contains MgATP. Section of map contoured to 0.028 in ChimeraX<sup>27</sup> and mesh for nucleotides contoured to isolevel 10 in PyMol (Schrödinger). (b and c) Comparison of the  $F_1$ -ATPase from State 2 *E. coli*  $F_1F_0$  ATP

synthase after incubation with MgATP (this study;  $\alpha$  in red,  $\beta$  in yellow,  $\gamma$  in blue,  $\varepsilon$  in green,  $\delta$  in teal and b in pink) or MgADP (pdb6OQV<sup>16</sup>; transparent white). **(b)**  $F_1$ -ATPase viewed from below shows that the central stalk (subunits  $\gamma$  and  $\varepsilon$ ) has rotated  $\sim 10^\circ$  in the clockwise direction after incubation with MgATP. **(c)**  $F_1$ -ATPase viewed from the side, with the closest  $\alpha\beta$  dimer removed for clarity, shows that the  $\beta_1$  ( $\beta_{DP}$ ) subunit has closed to contact the  $\gamma$  subunit and the  $\varepsilon$ CTH2 has dissociated from the central stalk after incubation with MgATP (unmodelled as it is not visible in the map).

### *Identification of sub-states.*

Further analysis of the data was implemented using Relion<sup>28</sup> and identified a series of sub-states that corresponded to different rotational and inhibition states of *E. coli*  $F_1F_0$  ATP synthase. Masked 3D classification without image shifts focused on the central rotor highlighted sub-classes in which the  $\varepsilon$ CTD adopted either a condensed “down” conformation or extended “half-up” conformation (Extended Data Fig. 2). The maps generated for each of these sub-states contained detailed information on the position of the  $\varepsilon$ CTD, even though the overall resolution of was reduced (in the range of 3.1-7.2 Å), likely due to the smaller number of particles on which they were based. Three of the maps from this classification describe three rotational positions of *E. coli*  $F_1F_0$  ATP synthase with the  $\varepsilon$ CTD in the condensed “down” position, and consequently are not inhibited by this protein motif, thereby allowing rotation of the central stalk (Fig. 2 and Movie 1). However, due to the likely high flexibility of this sample, it was still difficult to unequivocally assign the position of the membrane domain subunits in the maps. To obtain clearer information in this region, a refinement that focused on only the  $F_0$  motor was performed (Extended Data Fig. 2) and produced

maps of sufficient detail to enable fitting of the membrane region (consisting of the *a*, *b* and *c* subunits) using the structure identified from the same sample imaged with MgADP<sup>16</sup>.

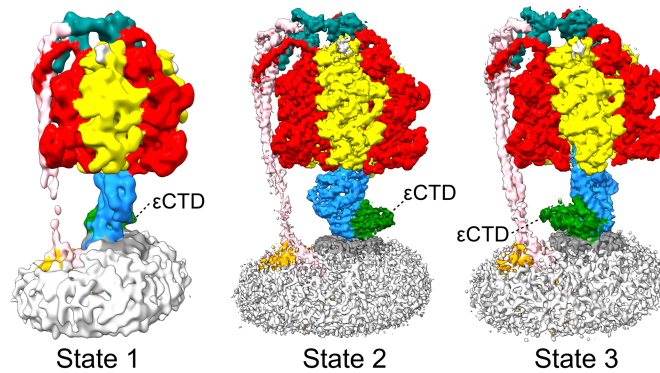

**Figure 2: Cryo-EM structures of *E. coli* F<sub>1</sub>F<sub>o</sub> ATP synthase in three rotational states without  $\epsilon$ CTD inhibition.** Maps of the three rotational states observed by classification on the central stalk (State 1 “down”, State 2 “down” and State 3 “down” in Extended data Fig. 2). Subunits  $\alpha$  in red,  $\beta$  in yellow,  $\gamma$  in blue,  $\epsilon$  in green,  $\delta$  in teal, *a* in orange, *b* in pink and *c* in grey, with detergent micelle in white. The  $\epsilon$ CTD (labelled) is in the condensed “down” state in all three maps.

### *The $\epsilon$ CTD attenuates the central stalk*

In the previous lower-resolution cryo-EM study, it was only possible to observe the different conformations of the  $\epsilon$ CTD by comparing structures from different rotational states (State 1 showed  $\epsilon$ CTD in the “half-up” conformation, State 2 showed a blurred  $\epsilon$ CTD and State 3 showed the  $\epsilon$ CTD in the “down” state). In this study, we were able to observe the  $\epsilon$ CTD in two conformations in both State 1 and State 2, whereas State 3 was only observed in the “down” state (Extended Data Fig. 2). The increased number of states identified was likely a result of the higher resolution obtained by using a 300 kV accelerator voltage to collect the images together with the

larger number of particles in the dataset. The importance of the number of particles was also underlined by the reduced resolution obtained as a consequence of having smaller numbers of particles corresponding to  $\epsilon$ CTD “down” sub-states in State 1 (Extended Data Fig. 2). By contrast, State 2 contained a more similar number of particles for both the  $\epsilon$ CTD “half-up” and “down” states, and consequently the maps were more detailed. When the  $\epsilon$ CTD “half-up” and “down” structures from State 2 were superposed using the *a* subunit of the stator, clear differences between the rotational positions of the rotor *c*-ring were observed (Fig. 3a and b). Most interestingly, the *c*-ring was rotated  $\sim 65^\circ$  in the synthesis direction as the  $\epsilon$ CTD transitioned from the “half-up” to the “down” sub-state, with this rotation facilitated by flexing in both the peripheral and central stalks.



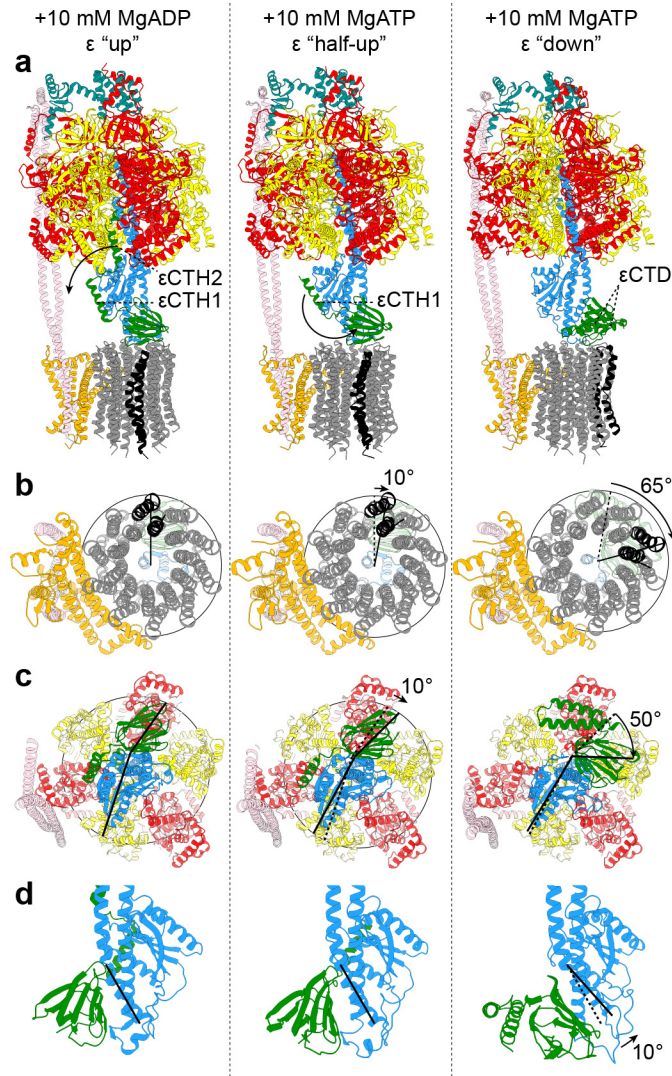

**Figure 3: Structural rearrangements of *E. coli* F<sub>1</sub>F<sub>0</sub> ATP synthase following incubation with ATP.** Left; after incubation with 10 mM MgADP (pdb6OQV<sup>16</sup>). Middle; after incubation with 10 mM MgATP where the εCTD is “half-up”. Right; after incubation with 10 mM MgATP where εCTD is “down” (all “State 2” rotary conformation). Subunits α in red, β in yellow, γ in blue, ε in green, δ in teal, a in orange, b in pink and c in grey, with a single c subunit colored black to highlight rotation of the c-ring. **a** and **b** are superposed using the stator a subunit, and **c** and **d** are superposed onto the F<sub>1</sub>-ATPase β barrel (residues α26-101 and β1-70). (**a**) Viewed from the side: the εCTD transitions from the “up” conformation, in which the εCTH2 is inserted into the F<sub>1</sub> motor,

to a “down” conformation via a “half-up” intermediate where only the  $\epsilon$ CTH1 interacts with the central rotor. **(b)** Viewed from below: the  $c$ -ring rotates two  $c$  subunit positions ( $\sim 75^\circ$ ) between the MgADP structure and MgATP  $\epsilon$ CTD “down” structure,  $\sim 10^\circ$  is facilitated by the rotation induced by ATP binding to the catalytic domain and  $\sim 65^\circ$  is facilitated by the transition of the  $\epsilon$ CTD from “up” to “down”. **(c)** Viewed from  $c$ -ring: binding of ATP induces a  $\sim 10^\circ$  rotation of the central stalk and the  $\epsilon$ CTD “up” to “down” transition induces a  $\sim 50^\circ$  rotation of the  $\epsilon$ NTD which is attached to the  $\gamma$  subunit and  $c$ -ring (see Fig. 4 also). **(d)** Viewed from the side, zoomed on the central rotor: the “foot” of the  $\gamma$  subunit bends to facilitate the rotation observed between the  $\epsilon$ CTD “half-up” and “down” states.

The different states showed evidence for torsional flexing in the central stalk that originated from a rotation of the  $\epsilon$  subunit relative to the  $\gamma$  subunit (Fig. 3c and 4), with the flexing facilitated near the “foot” of subunit  $\gamma$  (Fig. 3d). In the isolated rotor, the rotation observed between the  $\epsilon$ CTD “half-up” and “down” states was  $\sim 50^\circ$  (Figure 4). This movement is prevented in the “half-up” conformation by the  $\epsilon$ CTH1 binding to the opposite side of the  $\gamma$  subunit to which the  $\epsilon$  N-terminal domain ( $\epsilon$ NTD) binds, suggesting that the subunit  $\epsilon$  may regulate the flexibility of the  $\gamma$  subunit and thereby the efficiency of the enzyme. To test this hypothesis, two  $\epsilon$  subunit truncation mutants were generated: the first removed  $\epsilon$ CTH2 ( $\epsilon\Delta$ CTH2; residues  $\epsilon$ 1-104) and second removed both  $\epsilon$ CTH1 and  $\epsilon$ CTH2 ( $\epsilon\Delta$ CTH1+2; residues  $\epsilon$ 1-81) (Fig. 5a). ATP regeneration assays showed that, although the  $\epsilon\Delta$ CTH2 mutant had higher turnover than wildtype enzyme, the  $\epsilon\Delta$ CTH1+2 mutant showed even higher turnover (Fig. 5b), indicating that the enzyme had higher activity when the central stalk is free from restriction by the  $\epsilon$ CTD. Aerobic growth assays of these same mutants

showed that removal of the  $\epsilon$ CTH2 induced a growth phenotype, (Fig. 5c) similar to that seen when the five C-terminal residues are deleted from the  $\epsilon$  subunit<sup>29</sup>.

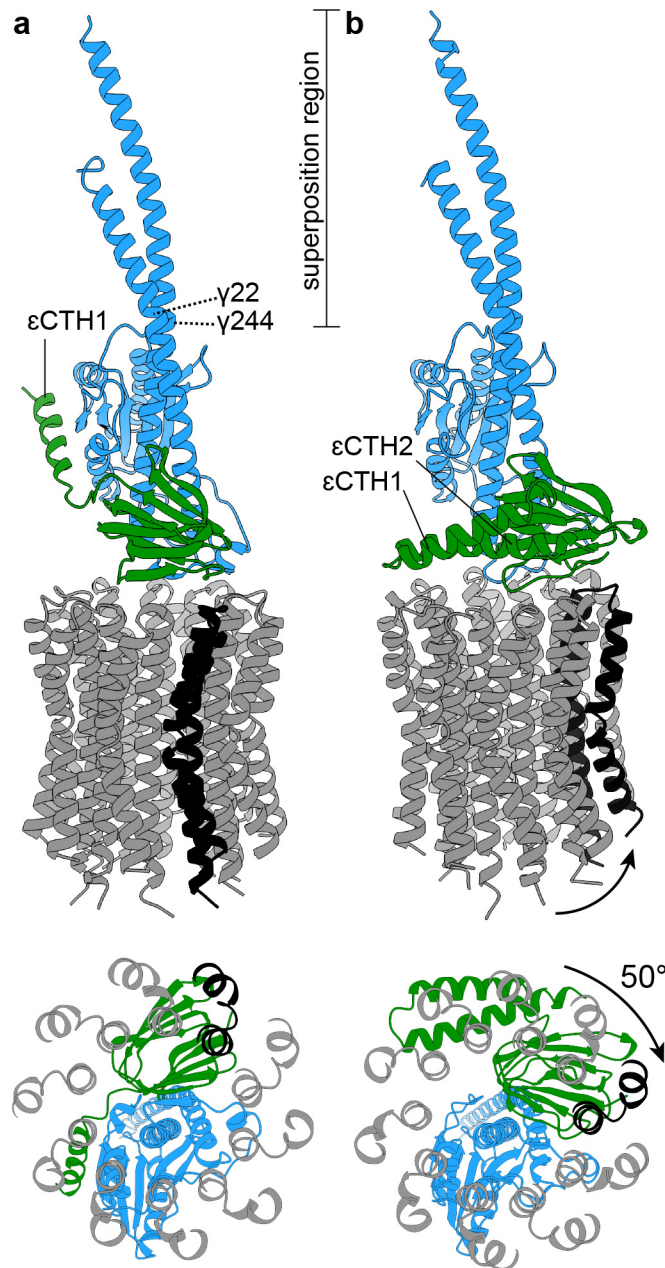

**Figure 4: Flexing within central stalk facilitates c-ring to rotation.** Superposition on the N- and C-termini of the  $\gamma$  subunit (residues 1-22 and 245-284) of the State 2 “half-up” and “down” central

stalk structures. Colors as in Fig. 3. Top; viewed from the side, and bottom; viewed from the periplasm. **(a)** The central rotor of the State 2 “half-up” structure. **(b)** The central rotor of the State 2 “down” structure. The *c*-ring is rotated  $\sim 50^\circ$  clockwise (synthesis direction) relative to the “half-up” structure.

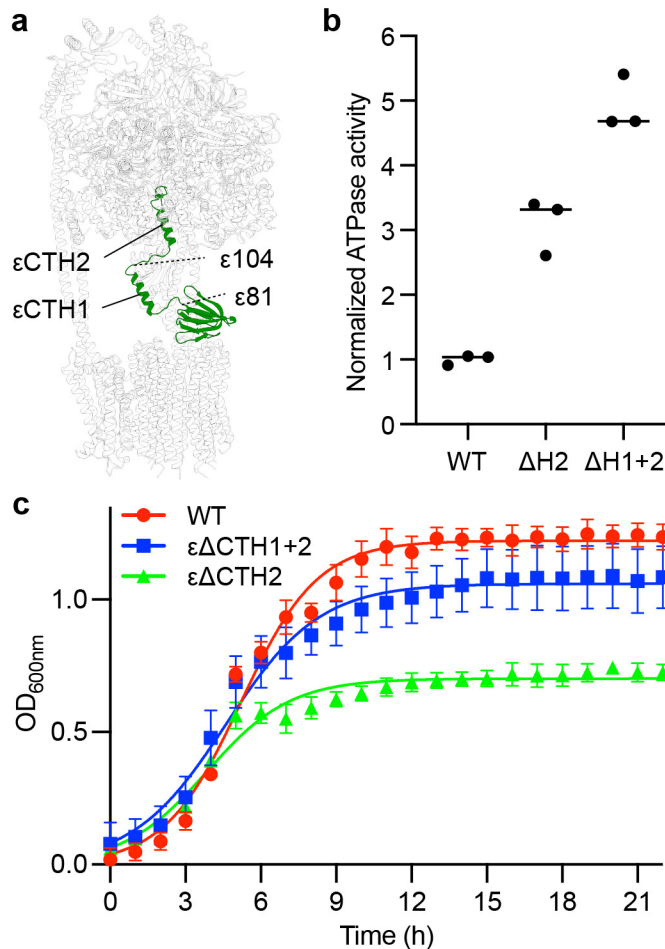

**Figure 5: The  $\epsilon$ CTD attenuates ATPase activity and aerobic growth beyond binding with the catalytic subunits.** **(a)** Location of residues  $\epsilon$ 81 and  $\epsilon$ 104 in the intact  $F_1F_0$  enzyme. **(b)** ATP regeneration assays of WT (containing full length subunit  $\epsilon$ ),  $\epsilon\Delta$ CTH2 ( $\epsilon$ 1-104; with the  $\epsilon$ CTH2 and linker removed) and  $\epsilon\Delta$ CTH1+2 ( $\epsilon$ 1-81; with  $\epsilon$ CTH1,  $\epsilon$ CTH2 and linkers removed). All data points and mean shown (normalized to the mean of WT). Removal of  $\epsilon$ CTH2 results in higher

ATP turnover than wild-type. Removal of both  $\epsilon$ CTH1 and  $\epsilon$ CTH2 shows higher ATP turnover than just removing  $\epsilon$ CTH2. (c) Succinate growth assays show that removal of  $\epsilon$ CTH2 reduces *E. coli* aerobic growth. n of 3; mean and standard deviation shown for each time point; measurements taken on distinct samples; line calculated using logistic growth analysis in Prism 8 for macOS.  $\epsilon\Delta$ CTH1+2 grows to a lower density, suggesting that the flexibility of the central stalk plays a role in cellular ATP synthase function.

**Discussion:** The cryo-EM and functional studies presented here provide new information on how conformational changes are induced in *E. coli* ATP synthase by MgATP and indicate how subunit  $\epsilon$  is able to modulate the function of the enzyme.

The cryo-EM structures provide additional detailed information on the structural changes and nucleotide occupancy introduced by binding MgATP and indicate that the transition of the  $\epsilon$ CTD from an “up” to a “down” state via a “half-up” intermediate is coupled with movements within both the  $F_1$  and  $F_0$  motors. Compared to the same enzyme observed after incubation with MgADP, incubation with MgATP induces the  $\beta_1$  ( $\beta_{DP}$ ) subunit in  $F_1$  to close and contact the  $\gamma$  subunit with  $P_i$  being liberated from the active site.  $\beta_3$  ( $\beta_{TP}$ ) exchanges ADP for ATP and the  $\gamma$  subunit rotates  $\sim 10^\circ$  in the synthesis direction. The  $\beta_2$  ( $\beta_E$ ) site is still loosely occupied by the product (ADP), similar to that seen in the bovine enzyme crystalized with reduced  $Mg^{2+}$  concentration (termed F1-PH)<sup>30</sup> (Fig. 1a). Given that we observe MgADP without  $P_i$  in  $\beta_1$  ( $\beta_{DP}$ ), we hypothesize that the structure we observed in this study represents the enzyme paused in the MgADP inhibited state, where  $P_i$  has been released but MgADP is bound to the  $\beta_1$  ( $\beta_{DP}$ ) site. ATPase assays previously performed on this exact protein purification incubated with 10 mM

MgATP for 45 seconds, predicted that the enzyme is being imaged in the presence of  $\sim 9.75$  mM ATP and  $\sim 0.3$  mM ADP<sup>18</sup>. So although the enzyme is undergoing ATP hydrolysis, it is likely paused in the MgADP inhibited state, consistent with the pausing observed in single molecule studies on related F<sub>1</sub>-ATPase enzymes<sup>31</sup>.

Although flexible coupling between the F<sub>1</sub> and F<sub>o</sub> motors is necessary to facilitate efficient enzyme function, whether this flexibility originates from the peripheral or central stalk has been controversial<sup>20,22,32-35</sup>. To date structural studies have only shown flexibility within the peripheral stalk<sup>36</sup>, with a central stalk remaining essentially rigid in all rotational states<sup>14,16,37-40</sup>. Our previous work on the *E. coli* enzyme incubated with MgADP showed that the peripheral stalk is able to flexibly couple the F<sub>1</sub> and F<sub>o</sub> motors, facilitating a single sub-step in the F<sub>o</sub> motor without any flexing in the central stalk. The structural and function data obtained here on the *E. coli* enzyme shows that flexibility also stems from the central stalk. Single molecule<sup>20,21</sup> and molecular dynamic studies<sup>22</sup> have indicated that the rotor can be flexible, but the present work shows how this flexibility is conferred and indicates that rotor torsional flexibility is important *E. coli* function. We hypothesize that the bridging of the  $\epsilon$ NTD to the opposite side of subunit  $\gamma$ , as seen in the “half-up” state, enables the  $\epsilon$ CTD is able to attenuate the rotational flexibility of the central stalk and thereby change the efficiency of the enzyme in response to cellular conditions. Because, in other species, the  $\epsilon$ CTD has been shown to bind ATP selectively<sup>41-43</sup>, cellular ATP concentration is likely to be the signal that controls this function of the subunit. The maps presented in this study are consistent with ATP binding to the  $\epsilon$ CTD when it is in the “down” position (Extended Data Fig. 5). However, the maps are not sufficiently detailed to distinguish between ATP and ADP, or even other small molecules. In the related bacteria *Geobacillus stearothermophilus* (more

commonly termed *Bacillus* PS3), the  $\epsilon$ CTD in the “up” conformation forms a single continuous helix<sup>14,44</sup> that does not bridge the  $\gamma$  subunit and  $\epsilon$ NTD in the same manner as *E. coli* enzyme. Therefore, it is unlikely that bacteria such as *Bacillus* PS3 utilize this mechanism to attenuate the flexibility of the central stalk.

The transition of the  $\epsilon$ CTD to the “down” state shown in this study corresponds to the *c*-ring being rotated  $\sim 65^\circ$  in the synthase direction relative to the stator. However, this rotation is a combination of movements in the peripheral and central stalks, with  $\sim 15^\circ$  facilitated by flexing of the peripheral stalk and  $\sim 50^\circ$  facilitated by twisting of the central stalk. The rotation of the *c*-ring between the  $\epsilon$ CTD “up” and “down” states is in the synthesis direction (clockwise when viewed from the periplasm), but because the enzyme was frozen in the presence of ATP (and therefore rotating in the hydrolysis direction), this rotation corresponds to the *c*-ring being retarded in these states. This observation highlights the resistance likely incurred at the stator rotor interface or between the *c*-ring and lipids. The molecular events that occur between the autoinhibited and MgADP states can be appreciated by interpolating between rotational State 2 of the enzyme incubated with MgADP<sup>16</sup> and the half-up and down substates of rotational State 2 incubated with MgATP (Fig. 3 and Movie 2). These structures indicate that the  $\epsilon$ CTH2 first dissociates from the catalytic head and the  $\beta 1$  ( $\beta_{DP}$ ) subunit releases  $P_i$ . The  $\beta 1$  ( $\beta_{DP}$ ) subunit then closes to the MgADP inhibited state, rotating the  $\gamma$  subunit  $\sim 10^\circ$ . In this state, the  $\epsilon$ CTH1 is still bound to the  $\gamma$  subunit, but this can dissociate and bind nucleotide with the rest of the  $\epsilon$  subunit to generate the down state. The reduced contacts between the  $\gamma$  and  $\epsilon$  subunits generated in this way increase the flexibility of

the central stalk, which can facilitate flexible coupling between the  $F_1$  and  $F_0$  motors, smoothing the process in an analogous way to the fluid coupling method found in automatic gear boxes.

**Data availability:** The models generated and analyzed during the current study are available from the RCSB PDB: 7KA5, 7KA6, 7KA7, 7KA8, 7KA9

The cryo-EM maps used to generate models are available from the EMDB: 22711, 22759, 22760, 22761, 22762, 22763, 22764, 22765, 22766, 22767, 22768, 22769

**Acknowledgments:** We wish to thank and acknowledge Dr Craig Yoshioka and Dr Claudia López (Oregon Health & Sciences University (OHSU)) for data collection and processing expertise. A.G.S was supported by a National Health and Medical Research Council Fellowship APP1159347 and Grant APP1146403. We wish to thank and acknowledge the use of the Victor Chang Innovation Centre, funded by the NSW Government, and the Electron Microscope Unit at UNSW Sydney, funded in part by the NSW Government. A portion of this research was supported by NIH grant U24GM129547 and performed at the Pacific Northwest Centre for Cryo-EM at OHSU and accessed through EMSL (grid.436923.9), a DOE Office of Science User Facility sponsored by the Office of Biological and Environmental Research. Molecular graphics and analyses performed with UCSF ChimeraX, developed by the Resource for Biocomputing, Visualization, and Informatics at the University of California, San Francisco, with support from National Institutes of Health R01-GM129325 and the Office of Cyber Infrastructure and Computational Biology, National Institute of Allergy and Infectious Diseases



**Contributions:** M.S., R.I and A.G.S. conceived the study and wrote the manuscript. M.S. performed the formal analysis of the study. JLW and YCZ aided in data acquisition, analysis and interpretation. A.G.S. supervised the study.

**Competing interests:** Authors declare no competing interests

### **Methods:**

Protein purification: The *E. coli* F<sub>1</sub>F<sub>0</sub> ATP synthase protein was prepared as described in Sobti et al. 2019<sup>18,26</sup>. Cysteine-free *E. coli* ATP synthase (all cysteines residues substituted with alanine and a His-tag introduced on the  $\beta$  subunit) was expressed in *E. coli* DK8 strain<sup>19</sup>. Cells were grown at 37°C in LB medium supplemented with 100  $\mu$ g/ml ampicillin for 5 h. The cells were harvested by centrifugation at 5,000 g, providing  $\sim$ 1.25 g cells per litre of culture. Cells were resuspended in lysis buffer containing 50 mM Tris/Cl pH 8.0, 100 mM NaCl, 5 mM MgCl<sub>2</sub>, 0.1 mM EDTA, 2.5% glycerol and 1  $\mu$ g/ml DNase I, and processed with three freeze thaw cycles followed by one pass through a continuous flow cell disruptor at 20 kPSI. Cellular debris was removed by centrifuging at 7,700  $\times$  g for 15 mins, and the membranes were collected by ultracentrifugation at 100,000  $\times$  g for 1 h. The ATP synthase complex was extracted from membranes at 4°C for 1 h by resuspending the pellet in extraction buffer consisting of 20 mM Tris/Cl, pH 8.0, 300 mM NaCl, 2 mM MgCl<sub>2</sub>, 100 mM sucrose, 20 mM imidazole, 10% glycerol, 4 mM digitonin and EDTA-free protease inhibitor tablets (Roche). Insoluble material was removed by ultracentrifugation at 100,000 g for 30 min. The complex was then purified by binding on Talon resin (Clontech) and eluted in 150 mM imidazole, and further purified with size exclusion chromatography on a 16/60 Superose 6 column equilibrated in a buffer containing 20 mM Tris/Cl pH 8.0, 100 mM NaCl, 1 mM digitonin

and 2 mM MgCl<sub>2</sub>. The purified protein was then concentrated to 11 μM (6 mg/ml), and snap frozen and stored for grid preparation.

Mutant constructs were made using the following primers:

εΔCTH2: Forward primer 5'-aagcgaaacgtaaggctgaagagcactaacaccggcttgaagcagcaaaa-3'

Reverse primer 5'-tggttttggctttcaagccgggttagtgctcttcagccttacgttt-3'

εΔCTH1+2: Forward primer 5'-aacgtgaccgttctggccgactaacaccggcttgaagcagcaaaa-3'

Reverse primer 5'-ggcttttggctttcaagccgggttagtcggccagaacgggtcacgtt-3'

Cryo-EM grid preparation: 1 μl of 100 mM ATP/100 mM MgCl<sub>2</sub> (pH 8.0) was added to an aliquot of 9 μl of purified cysteine-free *E. coli* F<sub>1</sub>F<sub>0</sub> ATP synthase at 11 μM (6 mg/ml) and the sample was incubated at 22°C for 30 s, before 3.5 μl was placed on glow-discharged holey gold grid (UltrAufoils R1.2/1.3, 200 Mesh). Grids were blotted for 3 s at 22°C, 100 % humidity and flash-frozen in liquid ethane using a FEI Vitrobot Mark IV (total time for sample application, blotting and freezing was 45 s).

Data collection: Grids were transferred to a Thermo Fisher Talos Arctica transmission electron microscope (TEM) operating at 200 kV and screened for ice thickness and particle density. Suitable grids were subsequently transferred to a Thermo Fisher Titan Krios TEM operating at 300 kV equipped with a Gatan BioQuantum energy filter and K3 Camera at the Pacific Northwest Centre for Cryo-EM at OHSU. Images were recorded automatically using serial EM at 81,000 x magnification yielding a pixel size of 0.54 Å (K3 operating in super resolution mode). A total dose of 48 electrons per Å<sup>2</sup> was used spread over 77 frames, with a total exposure time of 3.5 s. 8,620 movie micrographs were collected (Extended Data Fig.1).

Data processing: MotionCorr<sup>245</sup> was used to correct local beam-induced motion and to align resulting frames, with 9x9 patches and binning by a factor of two. Defocus and astigmatism values were estimated using Gctf<sup>38</sup> and 8,215 micrographs were selected after exclusion based on ice contamination, drift and astigmatism. ~1,000 particles were manually picked and subjected to 2D classification to generate templates for template picking in cryoSPARC<sup>46</sup>, yielding 869,147 particles. These particles were binned by a factor of four and subjected to 2D classification generating a final dataset of 429,638 particles. The locations of these particles were then imported into Relion<sup>28</sup>, re-extracted at full resolution, and further classified into 3D classes using a low pass filtered cryo-EM model generated from a previous study<sup>15</sup>, yielding the three main states related by a rotation of the central stalk (State1, State2 and State3 with 100,831, 215,003, and 113,804 particles, respectively). Focused classification, using a mask comprising the lower half of the central rotor, was implemented without performing image alignment in Relion 3.0, yielding the “half-up” and the “down” sub-classes in each of the three main states. A further F<sub>o</sub> focused classification without image shifts was performed on each of the “half-up” and “down” sub-classes to elucidate the position of F<sub>o</sub> subunits in the respective sub-states. See Extended Data Fig. 2 for a flowchart describing this classification, Extended Data Table 1 for a summary of data collection/processing statistics and Extended Data Fig. 6 for FSC curves.

Model building: Models were built and refined in Coot<sup>47</sup>, PHENIX<sup>48</sup> and ISOLDE<sup>49</sup> using pdb 6OQT, 6OQV, 6OQW<sup>16</sup> (*E. coli* ATP synthase incubated with MgADP) and 1AQT<sup>17</sup> (isolated *E. coli* ATP synthase subunit  $\epsilon$ ) as guides. See Extended Data Table 1 for a summary of refinement and validation statistics.

ATP regeneration assays: ATP regeneration assays were performed as in Sobti et al 2020<sup>26</sup>. In short; 10 µg of protein was added to 100 mM KCl, 50 mM MOPS pH 7.4, 1 mM MgCl<sub>2</sub>, 1 mM ATP, 2 mM PEP, 2.5 units/ml pyruvate kinase, 2.5 units/ml lactate dehydrogenase and 0.2 mM NADH, and monitored for OD at 340 nm at for up to 20 min (Extended Data Fig. 7).

Phenotypic assay for respiratory growth: Aerobic growth assays were performed similarly Shah & Duncan 2015<sup>29</sup>. Briefly, single colonies of the three constructs (WT, εΔCTH2 and εΔCTH1+2) transformed into DK8 cells<sup>19</sup> were grown at 37°C in 10ml of LB + 100 µg /ml ampicillin until OD at A<sub>600</sub> was ~0.4. The cells were then diluted 40-fold into minimal medium supplemented with 1mM MgCl<sub>2</sub>, 0.1% amino acid solution, 0.1% trace elements, 100 µg /ml ampicillin and 0.8% succinate. 0.4 ml cultures were set up in triplicates in a 48-well transparent plate sealed with a Breathe-Easy® sealing membrane. Growth was monitored and measured at 37°C in a PHERAstar FS plate reader with shaking at 100 rpm until cells reached stationary phase.

### **References:**

- 1 Walker, J. E. The ATP synthase: the understood, the uncertain and the unknown. *Biochem Soc Trans* **41**, 1-16, doi:10.1042/BST20110773 (2013).
- 2 Kuhlbrandt, W. Structure and Mechanisms of F-Type ATP Synthases. *Annu Rev Biochem*, doi:10.1146/annurev-biochem-013118-110903 (2019).
- 3 Stewart, A. G., Laming, E. M., Sobti, M. & Stock, D. Rotary ATPases - dynamic molecular machines. *Curr Opin Struct Biol* **25**, 40-48, doi:10.1016/j.sbi.2013.11.013 (2014).
- 4 Abrahams, J. P., Leslie, A. G., Lutter, R. & Walker, J. E. Structure at 2.8 Å resolution of F<sub>1</sub>-ATPase from bovine heart mitochondria. *Nature* **370**, 621-628, doi:10.1038/370621a0 (1994).
- 5 Boyer, P. D. The ATP synthase - a splendid molecular machine. *Annu Rev Biochem* **66**, 717-749, doi:10.1146/annurev.biochem.66.1.717 (1997).

- 6 Capaldi, R. A., Schulenberg, B., Murray, J. & Aggeler, R. Cross-linking and electron microscopy studies of the structure and functioning of the *Escherichia coli* ATP synthase. *J Exp Biol* **203**, 29-33 (2000).
- 7 Sielaff, H., Duncan, T. M. & Borsch, M. The regulatory subunit epsilon in *Escherichia coli* FoF<sub>1</sub>-ATP synthase. *Biochim Biophys Acta Bioenerg* **1859**, 775-788, doi:10.1016/j.bbabi.2018.06.013 (2018).
- 8 Hui Guo *et al.* Structure of mycobacterial ATP synthase with the TB drug bedaquiline. *bioRxiv*, doi:<https://doi.org/10.1101/2020.08.06.225375> (2020).
- 9 Milgrom, Y. M. & Duncan, T. M. F-ATP-ase of *Escherichia coli* membranes: The ubiquitous MgADP-inhibited state and the inhibited state induced by the epsilon-subunit's C-terminal domain are mutually exclusive. *Biochim Biophys Acta Bioenerg* **1861**, 148189, doi:10.1016/j.bbabi.2020.148189 (2020).
- 10 Fitin, A. F., Vasilyeva, E. A. & Vinogradov, A. D. An inhibitory high affinity binding site for ADP in the oligomycin-sensitive ATPase of beef heart submitochondrial particles. *Biochem Biophys Res Commun* **86**, 434-439, doi:10.1016/0006-291x(79)90884-2 (1979).
- 11 Minkov, I. B., Fitin, A. F., Vasilyeva, E. A. & Vinogradov, A. D. Mg<sup>2+</sup>-induced ADP-dependent inhibition of the ATPase activity of beef heart mitochondrial coupling factor F<sub>1</sub>. *Biochem Biophys Res Commun* **89**, 1300-1306, doi:10.1016/0006-291x(79)92150-8 (1979).
- 12 Laget, P. P. & Smith, J. B. Inhibitory properties of endogenous subunit epsilon in the *Escherichia coli* F<sub>1</sub> ATPase. *Arch Biochem Biophys* **197**, 83-89 (1979).
- 13 Cingolani, G. & Duncan, T. M. Structure of the ATP synthase catalytic complex F<sub>1</sub> from *Escherichia coli* in an autoinhibited conformation. *Nat Struct Mol Biol* **18**, 701-707, doi:10.1038/nsmb.2058 (2011).
- 14 Guo, H., Suzuki, T. & Rubinstein, J. L. Structure of a bacterial ATP synthase. *Elife* **8**, doi:10.7554/eLife.43128 (2019).
- 15 Sobti, M. *et al.* Cryo-EM structures of the autoinhibited *E. coli* ATP synthase in three rotational states. *Elife* **5**, doi:10.7554/eLife.21598 (2016).
- 16 Sobti, M. *et al.* Cryo-EM structures provide insight into how *E. coli* F<sub>1</sub>F<sub>o</sub> ATP synthase accommodates symmetry mismatch. *Nat Commun* **11**, 2615, doi:10.1038/s41467-020-16387-2 (2020).
- 17 Uhlin, U., Cox, G. B. & Guss, J. M. Crystal structure of the epsilon subunit of the proton-translocating ATP synthase from *Escherichia coli*. *Structure* **5**, 1219-1230 (1997).
- 18 Sobti, M. *et al.* Cryo-EM reveals distinct conformations of *E. coli* ATP synthase on exposure to ATP. *Elife* **8**, doi:10.7554/eLife.43864 (2019).
- 19 Ishmukhametov, R., Galkin, M. A. & Vik, S. B. Ultrafast purification and reconstitution of His-tagged cysteine-less *Escherichia coli* F<sub>1</sub>F<sub>o</sub> ATP synthase. *Biochim Biophys Acta* **1706**, 110-116, doi:10.1016/j.bbabi.2004.09.012 (2005).
- 20 Okuno, D., Iino, R. & Noji, H. Stiffness of gamma subunit of F(1)-ATPase. *Eur Biophys J* **39**, 1589-1596, doi:10.1007/s00249-010-0616-9 (2010).
- 21 Sielaff, H. *et al.* Domain compliance and elastic power transmission in rotary F(O)F(1)-ATPase. *Proc Natl Acad Sci U S A* **105**, 17760-17765, doi:10.1073/pnas.0807683105 (2008).

- 22 Okazaki, K. & Hummer, G. Elasticity, friction, and pathway of gamma-subunit rotation in FoF1-ATP synthase. *Proc Natl Acad Sci U S A* **112**, 10720-10725, doi:10.1073/pnas.1500691112 (2015).
- 23 Ferrandiz, M. J. & de la Campa, A. G. The membrane-associated FoF<sub>1</sub> ATPase is essential for the viability of *Streptococcus pneumoniae*. *FEMS Microbiol Lett* **212**, 133-138 (2002).
- 24 Cortes, P. R., Pinas, G. E., Cian, M. B., Yandar, N. & Echenique, J. Stress-triggered signaling affecting survival or suicide of *Streptococcus pneumoniae*. *Int J Med Microbiol* **305**, 157-169, doi:10.1016/j.ijmm.2014.12.002 (2015).
- 25 Gerlini, A. *et al.* The role of host and microbial factors in the pathogenesis of pneumococcal bacteraemia arising from a single bacterial cell bottleneck. *PLoS Pathog* **10**, e1004026, doi:10.1371/journal.ppat.1004026 (2014).
- 26 Sobti, M., Ishmukhametov, R. & Stewart, A. G. ATP Synthase: Expression, Purification, and Function. *Methods Mol Biol* **2073**, 73-84, doi:10.1007/978-1-4939-9869-2\_5 (2020).
- 27 Goddard, T. D. *et al.* UCSF ChimeraX: Meeting modern challenges in visualization and analysis. *Protein Sci* **27**, 14-25, doi:10.1002/pro.3235 (2018).
- 28 Scheres, S. H. RELION: implementation of a Bayesian approach to cryo-EM structure determination. *J Struct Biol* **180**, 519-530, doi:10.1016/j.jsb.2012.09.006 (2012).
- 29 Shah, N. B. & Duncan, T. M. Aerobic Growth of *Escherichia coli* Is Reduced, and ATP Synthesis Is Selectively Inhibited when Five C-terminal Residues Are Deleted from the Subunit of ATP Synthase. *J Biol Chem* **290**, 21032-21041, doi:10.1074/jbc.M115.665059 (2015).
- 30 Rees, D. M., Montgomery, M. G., Leslie, A. G. & Walker, J. E. Structural evidence of a new catalytic intermediate in the pathway of ATP hydrolysis by F<sub>1</sub>-ATPase from bovine heart mitochondria. *Proc Natl Acad Sci U S A* **109**, 11139-11143, doi:10.1073/pnas.1207587109 (2012).
- 31 Hirono-Hara, Y. *et al.* Pause and rotation of F(1)-ATPase during catalysis. *Proc Natl Acad Sci U S A* **98**, 13649-13654, doi:10.1073/pnas.241365698 (2001).
- 32 Zhou, M. *et al.* Ion mobility-mass spectrometry of a rotary ATPase reveals ATP-induced reduction in conformational flexibility. *Nat Chem* **6**, 208-215, doi:10.1038/nchem.1868 (2014).
- 33 Muench, S. P. *et al.* Subunit positioning and stator filament stiffness in regulation and power transmission in the V1 motor of the *Manduca sexta* V-ATPase. *J Mol Biol* **426**, 286-300, doi:10.1016/j.jmb.2013.09.018 (2014).
- 34 Song, C. F. *et al.* Flexibility within the rotor and stators of the vacuolar H<sup>+</sup>-ATPase. *PLoS One* **8**, e82207, doi:10.1371/journal.pone.0082207 (2013).
- 35 Stewart, A. G. The molecular V brake. *J Mol Biol* **426**, 273-274, doi:10.1016/j.jmb.2013.10.003 (2014).
- 36 Stewart, A. G., Lee, L. K., Donohoe, M., Chaston, J. J. & Stock, D. The dynamic stator stalk of rotary ATPases. *Nat Commun* **3**, 687, doi:10.1038/ncomms1693 (2012).
- 37 Murphy, B. J. *et al.* Rotary substates of mitochondrial ATP synthase reveal the basis of flexible F<sub>1</sub>-F<sub>o</sub> coupling. *Science* **364**, doi:10.1126/science.aaw9128 (2019).
- 38 Spikes, T. E., Montgomery, M. G. & Walker, J. E. Structure of the dimeric ATP synthase from bovine mitochondria. *Proc Natl Acad Sci U S A*, doi:10.1073/pnas.2013998117 (2020).

- 39 Hahn, A., Vonck, J., Mills, D. J., Meier, T. & Kuhlbrandt, W. Structure, mechanism, and regulation of the chloroplast ATP synthase. *Science* **360**, doi:10.1126/science.aat4318 (2018).
- 40 Srivastava, A. P. *et al.* High-resolution cryo-EM analysis of the yeast ATP synthase in a lipid membrane. *Science* **360**, doi:10.1126/science.aas9699 (2018).
- 41 Krah, A., Kato-Yamada, Y. & Takada, S. The structural basis of a high affinity ATP binding epsilon subunit from a bacterial ATP synthase. *PLoS One* **12**, e0177907, doi:10.1371/journal.pone.0177907 (2017).
- 42 Krah, A., Huber, R. G., McMillan, D. G. G. & Bond, P. J. The Molecular Basis for Purine Binding Selectivity in the Bacterial ATP Synthase Subunit. *Chembiochem*, doi:10.1002/cbic.202000291 (2020).
- 43 Yagi, H. *et al.* Structures of the thermophilic F<sub>1</sub>-ATPase epsilon subunit suggesting ATP-regulated arm motion of its C-terminal domain in F<sub>1</sub>. *Proc Natl Acad Sci U S A* **104**, 11233-11238, doi:10.1073/pnas.0701045104 (2007).
- 44 Shirakihara, Y. *et al.* Structure of a thermophilic F<sub>1</sub>-ATPase inhibited by an epsilon-subunit: deeper insight into the epsilon-inhibition mechanism. *FEBS J* **282**, 2895-2913, doi:10.1111/febs.13329 (2015).
- 45 Zheng, S. Q. *et al.* MotionCor2: anisotropic correction of beam-induced motion for improved cryo-electron microscopy. *Nat Methods* **14**, 331-332, doi:10.1038/nmeth.4193 (2017).
- 46 Punjani, A., Rubinstein, J. L., Fleet, D. J. & Brubaker, M. A. cryoSPARC: algorithms for rapid unsupervised cryo-EM structure determination. *Nat Methods* **14**, 290-296, doi:10.1038/nmeth.4169 (2017).
- 47 Emsley, P., Lohkamp, B., Scott, W. G. & Cowtan, K. Features and development of Coot. *Acta Crystallogr D Biol Crystallogr* **66**, 486-501, doi:10.1107/S0907444910007493 (2010).
- 48 Afonine, P. V. *et al.* Real-space refinement in PHENIX for cryo-EM and crystallography. *Acta Crystallogr D Struct Biol* **74**, 531-544, doi:10.1107/S2059798318006551 (2018).
- 49 Croll, T. I. ISOLDE: a physically realistic environment for model building into low-resolution electron-density maps. *Acta Crystallogr D Struct Biol* **74**, 519-530, doi:10.1107/S2059798318002425 (2018).
